# Supplementary material for: In Candida glabrata, ERMES Component GEM1 Controls Mitochondrial Morphology, mtROS, and Drug Efflux Pump Expression, Resulting in Azole Susceptibility
Source: MDPI journal article supplement (doi:10.3390/jof9020240), 2023-02-10
Supplement: s1 [file s1]

Table S1 List of strains

| Strain               | parent  | genotype                                                                | Reference  |
|----------------------|---------|-------------------------------------------------------------------------|------------|
| 2001HTU              |         | <i>Δhis3 Δtrp1 Δura3</i>                                                | [49]       |
| KUE100               |         | <i>his3 yku80::SAT1</i> flipper                                         | [50]       |
| <i>Δmdm10</i>        | KUE100  | <i>mdm10::CgHIS3</i>                                                    | This study |
| <i>Δmdm12</i>        | KUE100  | <i>mdm12::CgHIS3</i>                                                    | This study |
| <i>Δmdm34</i>        | KUE100  | <i>mdm34::CgHIS3</i>                                                    | This study |
| <i>Δmmm1</i>         | KUE100  | <i>mmm1::CgHIS3</i>                                                     | This study |
| <i>Δgem1</i>         | KUE100  | <i>gem1::CgHIS3</i>                                                     | This study |
| <i>Δgem1Δmdm10</i>   | KUE10   | <i>gem1::loxP mdm10::CgHIS3</i>                                         | This study |
| <i>Δgem1Δmdm12</i>   | KUE100  | <i>gem1::loxP mdm12::CgHIS3</i>                                         | This study |
| <i>Δgem1Δmdm34</i>   | KUE100  | <i>gem1::loxP mdm34::CgHIS3</i>                                         | This study |
| <i>Δgem1Δmmm1</i>    | KUE100  | <i>gem1::loxP mmm1::CgHIS3</i>                                          | This study |
| <i>Δgem1</i> (V)     | 2001HTU | <i>gem1::loxP</i> , pGRB2.0                                             | This study |
| <i>Δgem1</i> (GEM1)  | 2001HTU | <i>gem1::loxP MDM34::mCherry-natMX6</i> , pGRB-GFP- <i>GEM1</i>         | This study |
| <i>Δgem1</i> (S19A)  | 2001HTU | <i>gem1::loxP MDM34::mCherry-natMX6</i> , pGRB-GFP- <i>gem1</i> (T19A)  | This study |
| <i>Δgem1</i> (E216A) | 2001HTU | <i>gem1::loxP MDM34::mCherry-natMX6</i> , pGRB-GFP- <i>gem1</i> (E216A) | This study |
| <i>Δgem1</i> (E344A) | 2001HTU | <i>gem1::loxP MDM34::mCherry-natMX6</i> , pGRB-GFP- <i>gem1</i> (E344A) | This study |
| <i>Δgem1</i> (S452A) | 2001HTU | <i>gem1::loxP MDM34::mCherry-natMX6</i> , pGRB-GFP- <i>gem1</i> (S452A) | This study |

Table S2 List of PCR primers

| Primer      | sequence (5'→3')                                  |
|-------------|---------------------------------------------------|
| CDR1-F      | ATGCTAACCCAGCTGAATGG                              |
| CDR1-R      | TCTTTGGAAGCTCGTTGGAC                              |
| CDR2-F      | CGCCAACCATGTAACAGATG                              |
| CDR2-R      | TTTGAGCCACAGATCCACAC                              |
| PDR1-F      | GTGAAGCGGAAGAAATGCTC                              |
| PDR1-R      | TATTCGTCGAGAGCAAGCTG                              |
| GFP-GEM1-F1 | cactaaagggaacaaaagctggagctcCCAGATTGATACTGTACACGTC |
| GFP-GEM1-R1 | ctttactcattctagaTGATAATCCTGTTACAGCCT              |
| GFP-GEM1-F2 | aggattatcatctagaATGAGTAAAGGAGAAGAAGT              |
| GFP-GEM1-R2 | ctttgtcatgtcgacTCTAGATTGTATAGTTCATCCATGCC         |
| GFP-GEM1-F3 | actatacaaatctagagtcgacATGACAAAAGAAACCATCAG        |
| GFP-GEM1-R3 | ctcactataggcggaattgggtaccTATTTATCTTGGTCAAGAAT     |
| pGRB2.1-F1  | GTACCCAATTGCGCCCTATAGTGA                          |
| pGRB2.1-R1  | AGGATTATCACTCCAGCTTTTGTCCCTTTAGTG                 |
| MDM34-F1    | GAAAAGAGACTCAAAAAGAGCG                            |
| MDM34-R1    | GTTAATTAACCCGGGATCCGATAATATGGTGGTGGTGGCG          |
| MDM34-F2    | GTTTAAACGAGCTCGAATTCGGTATTTTTAAGCGTTATTGCTA       |
| MDM34-R2    | CAACGGTCAACAACATCTTC                              |
| PFA6A-F     | CGGATCCCCGGGTAAATTAAC                             |
| pFA6a-R     | GAATTCGAGCTCGTTTAAAC                              |
| TOM70-F1    | CATGATGCTACTGAAGAGTCGG                            |
| TOM70-R1    | GTTAATTAACCCGGGATCCGAAATCCTTGTCCACCATTACGAC       |
| TOM70-F2    | GTTTAAACGAGCTCGAATTCATAAGCGAGCTCCTAAACCAGAC       |
| TOM70-R2    | AAGGCATTAGCCTTCTCAAACG                            |

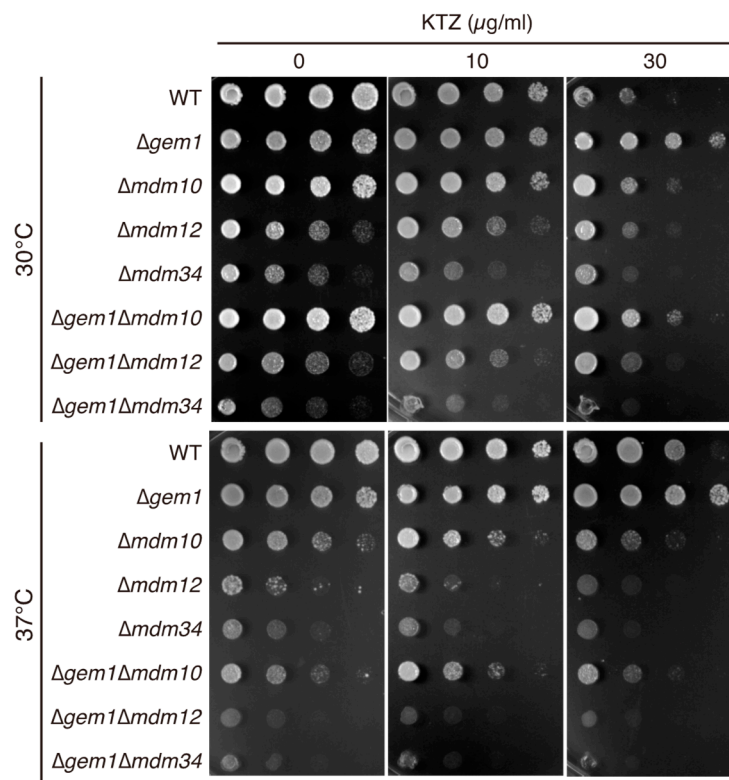

### Supplemental figureS1

Growth of strains lacking ERMES components in the presence or absence of ketoconazole. The cells were diluted to OD<sub>600</sub> of 0.5 in water and spotted in 4-fold serial dilutions (indicated by triangles) on minimal SD medium containing the indicated concentration of ketoconazole (KTZ). Cells were incubated for two days at 30 °C or 37 °C.

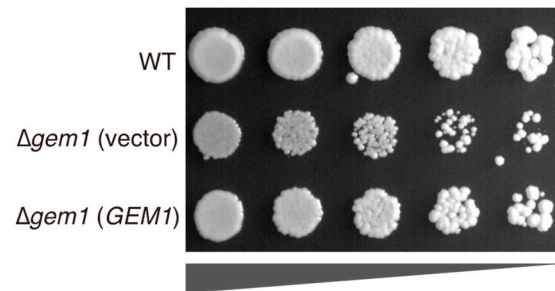

### Supplemental figureS2

Expression of GFP-GEM1 plasmid in  $\Delta gem1$  cells. Wild-type cells (KUE100) and  $\Delta gem1$  cells, which were transformed with pGRB2.0 (vector) or pGRB-GFP-GEM1(*GEM1*), were spotted in 4-fold serial dilutions, as indicated by triangles, and incubated at 30 °C in SC-Ura medium for 3days.
